# Supplementary material
Source: PubMed Central journal article supplement (PMC6434932)

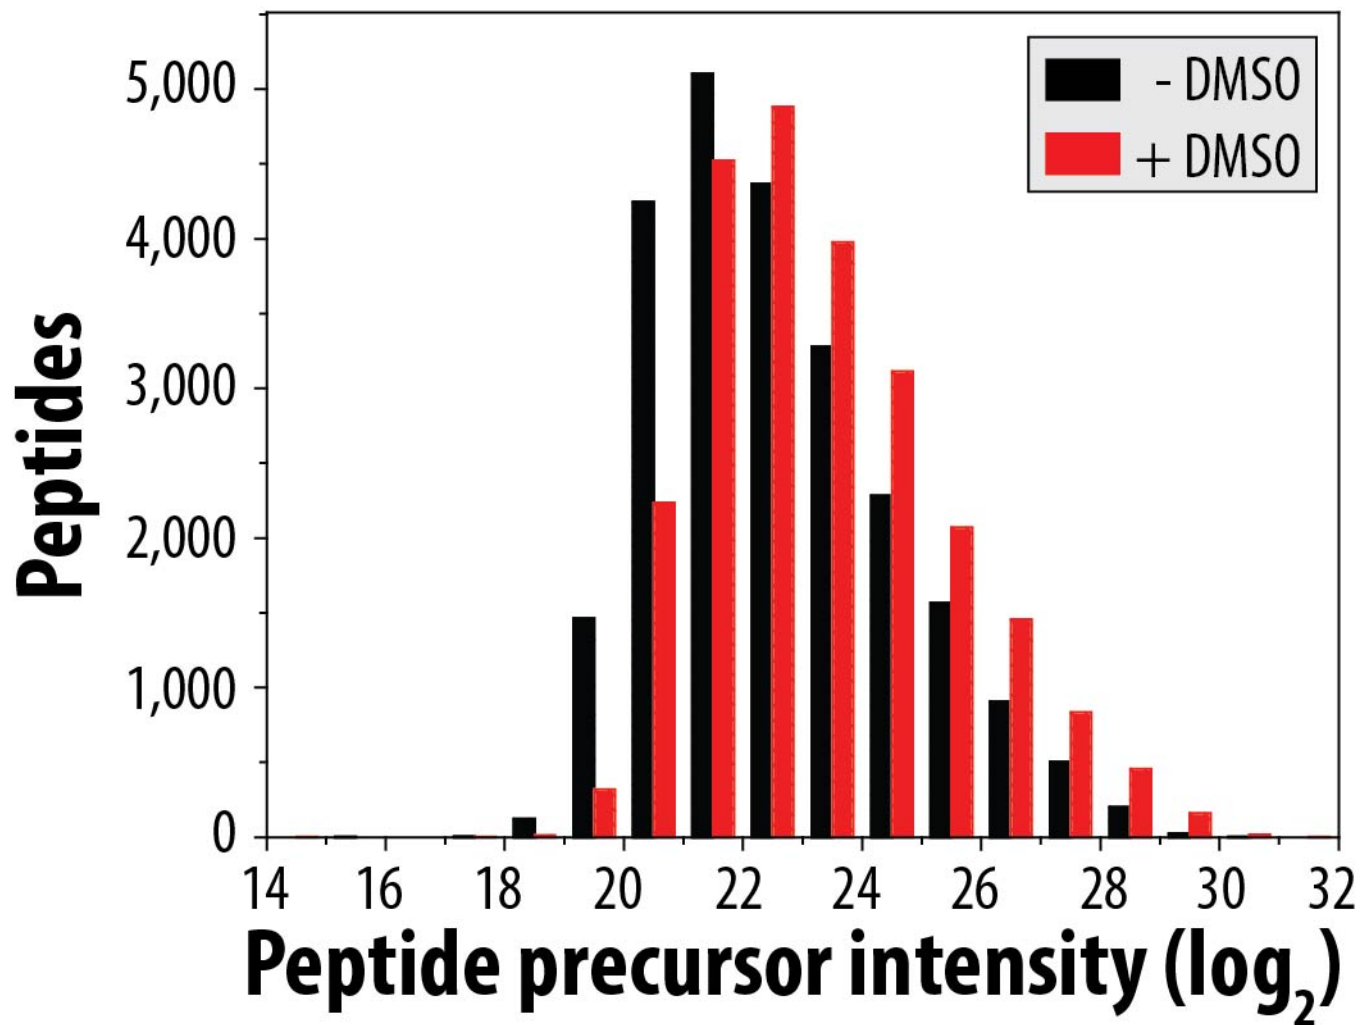

Supplementary Figure 1

Distribution of the intensities of peptide precursors in the survey scan.

Red is with and black is without the addition of DMSO.

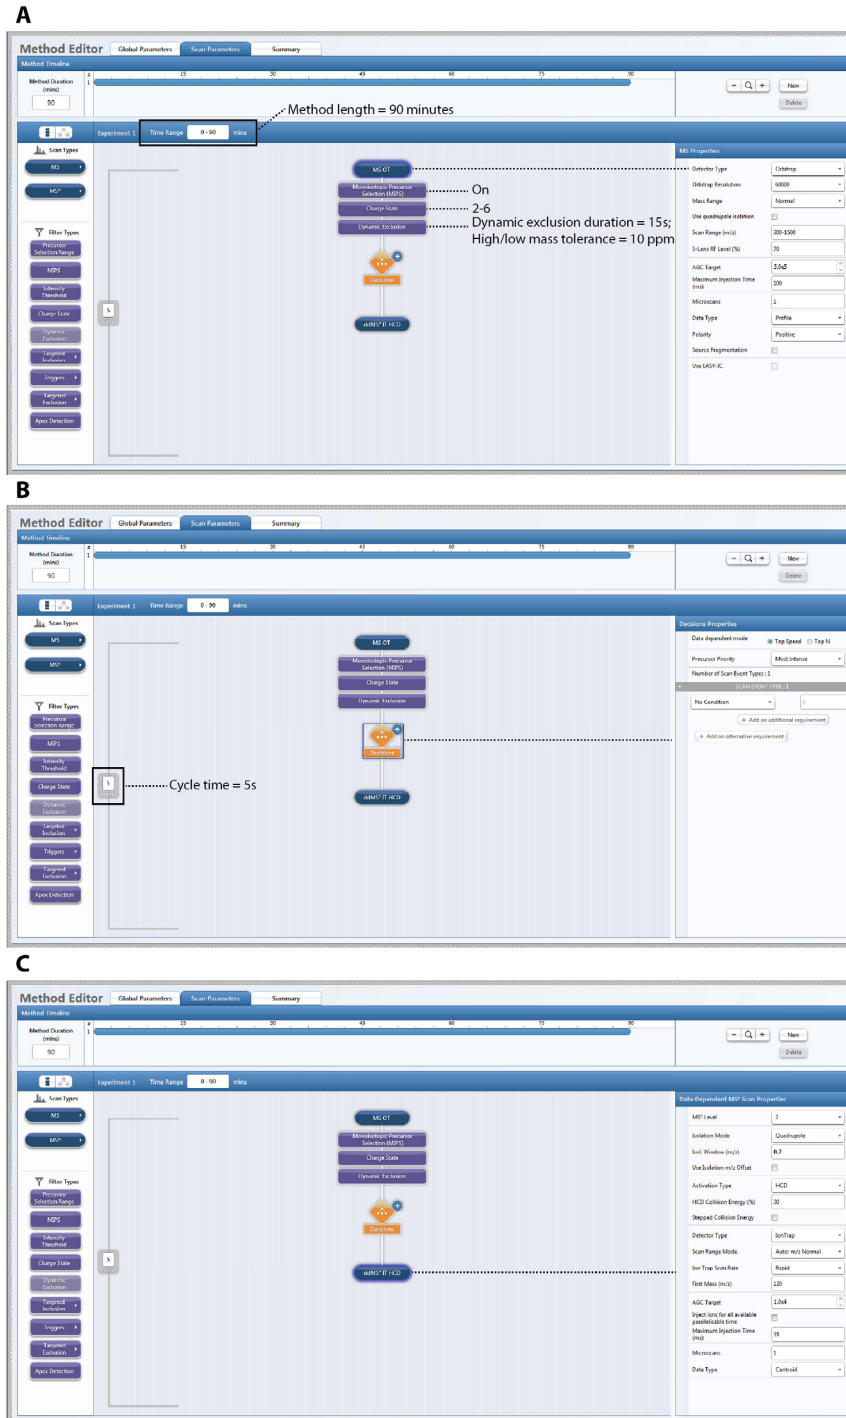

## Supplementary Figure 2

Location of instrument parameters within Method Editor on the Orbitrap Fusion.

(A) MS<sup>1</sup> resolution, MS<sup>1</sup> detector type, and MS<sup>1</sup> AGC target are set within the MS OT section. (B) Top speed data dependent mode and precursor priority are selected within the Decisions section. (C) MS<sup>2</sup> detector type, MS<sup>2</sup> isolation window, MS<sup>2</sup> AGC target, MS<sup>2</sup> max injection time, activation type, collision energy, detector type and scan rate are set within the MS/MS IT section.#

# MS<sup>1</sup> Analysis

60K MS<sup>1</sup>

## Quadrupole Isolation; Fragmentation

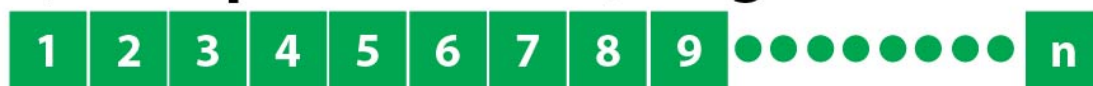

## MS<sup>2</sup> Analysis

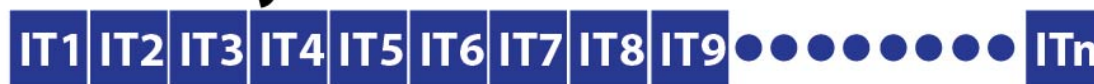

5 Seconds

---

Supplementary Figure 3

Orbitrap Fusion scan sequence.

#

|                |            |                    |                     |                   |          |
|----------------|------------|--------------------|---------------------|-------------------|----------|
| <b>Line 1:</b> | heat = 260 | filament (fil) = 0 | velocity (vel) = 10 | delay (del) = 128 | pull = 0 |
| <b>Line 2:</b> | heat = 260 | filament (fil) = 0 | velocity (vel) = 20 | delay (del) = 128 | pull = 0 |
| <b>Line 3:</b> | heat = 250 | filament (fil) = 0 | velocity (vel) = 15 | delay (del) = 140 | pull = 0 |
| <b>Line 4:</b> | heat = 270 | filament (fil) = 0 | velocity (vel) = 15 | delay (del) = 128 | pull = 0 |

#### Supplementary Table 1

Recommended laser puller settings.

HEAT is the laser power output. FILAMENT is the scan length of the heat supplying laser; the manufacturer's protocol suggests a filament setting of 0 for fused silica. If tips are pulled too thin, the VELOCITY setting should be increased, while decreasing the HEAT setting. DELAY sets the time at which the fused silica is pulled relative to laser deactivation. PULL controls the force with which the fused silica is pulled. A PULL setting of 0 is recommended for fused silica.

| <b>Experiment</b> | <b>MS/MS scans</b> | <b>PSMs</b> | <b>Unique peptides</b> |
|-------------------|--------------------|-------------|------------------------|
| 1                 | 80,900             | 43,423      | 34,535                 |
| 2                 | 81,252             | 43,622      | 34,495                 |
| 3                 | 78,001             | 42,339      | 33,450                 |
| 4                 | 80,916             | 43,326      | 34,347                 |
| 5                 | 81,235             | 43,343      | 34,449                 |

**Supplementary Table 2**

Number of MS/MS scans, PSMs and unique peptides for five replicate yeast experiments.

| <b>Gradient length(min)</b> | <b>MS/MS scans</b> | <b>PSMs</b> | <b>Unique peptides</b> |
|-----------------------------|--------------------|-------------|------------------------|
| 30                          | 45,632             | 27,700      | 18,152                 |
| 45                          | 60,656             | 35,421      | 26,931                 |
| 70                          | 86,267             | 52,872      | 36,900                 |
| 120                         | 124,014            | 74,813      | 44,743                 |
| 180                         | 169,181            | 96,121      | 48,970                 |
| 240                         | 212,088            | 115,077     | 51,211                 |

**Supplementary Table 3**

Number of MS/MS scans, PSMs and unique peptides for gradient length experiments (Figure 6).

# Attachment to Flex Ion Source (PC)

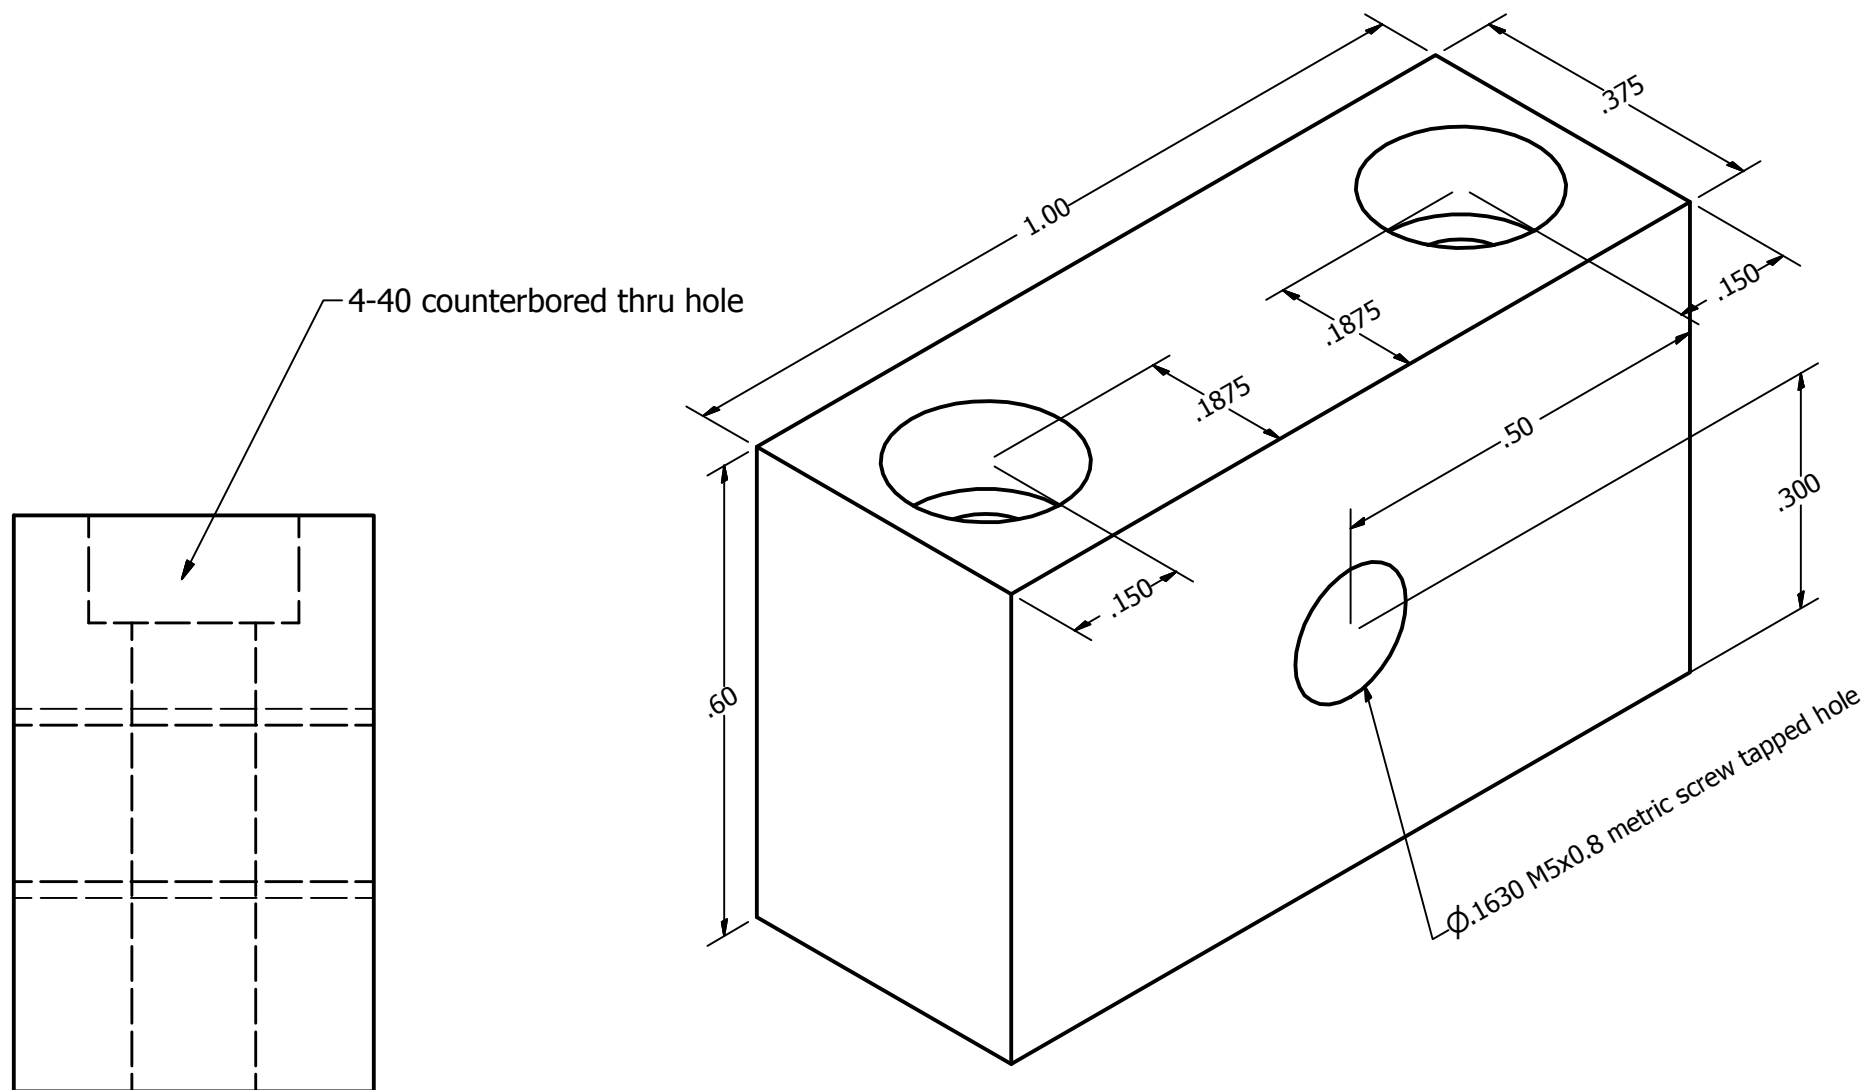

# Bottom Aluminum Layer

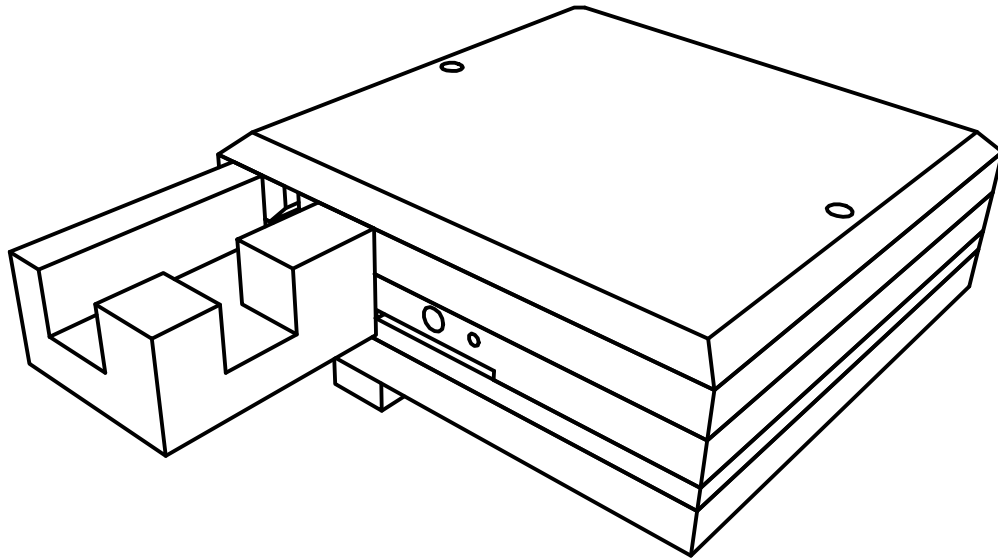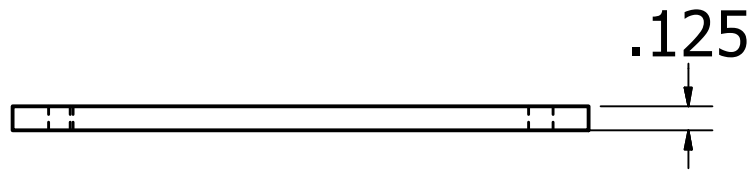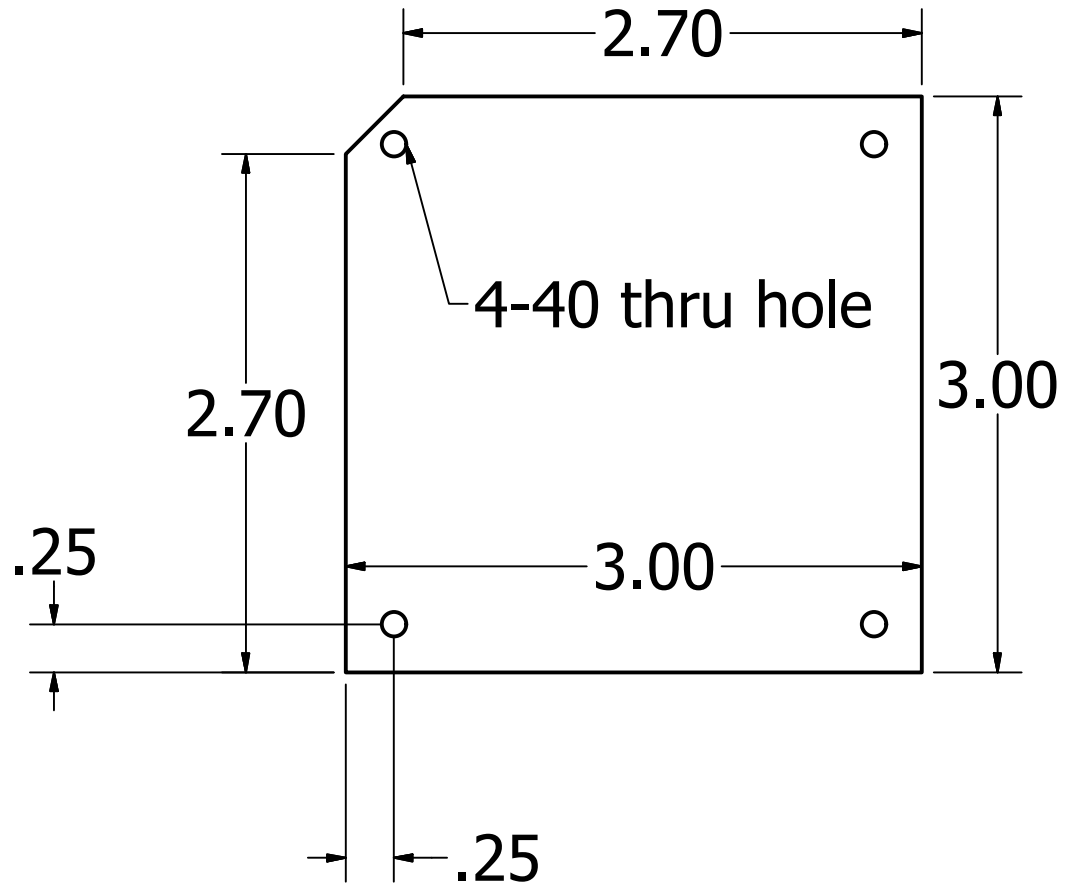



# Cavity, contains column

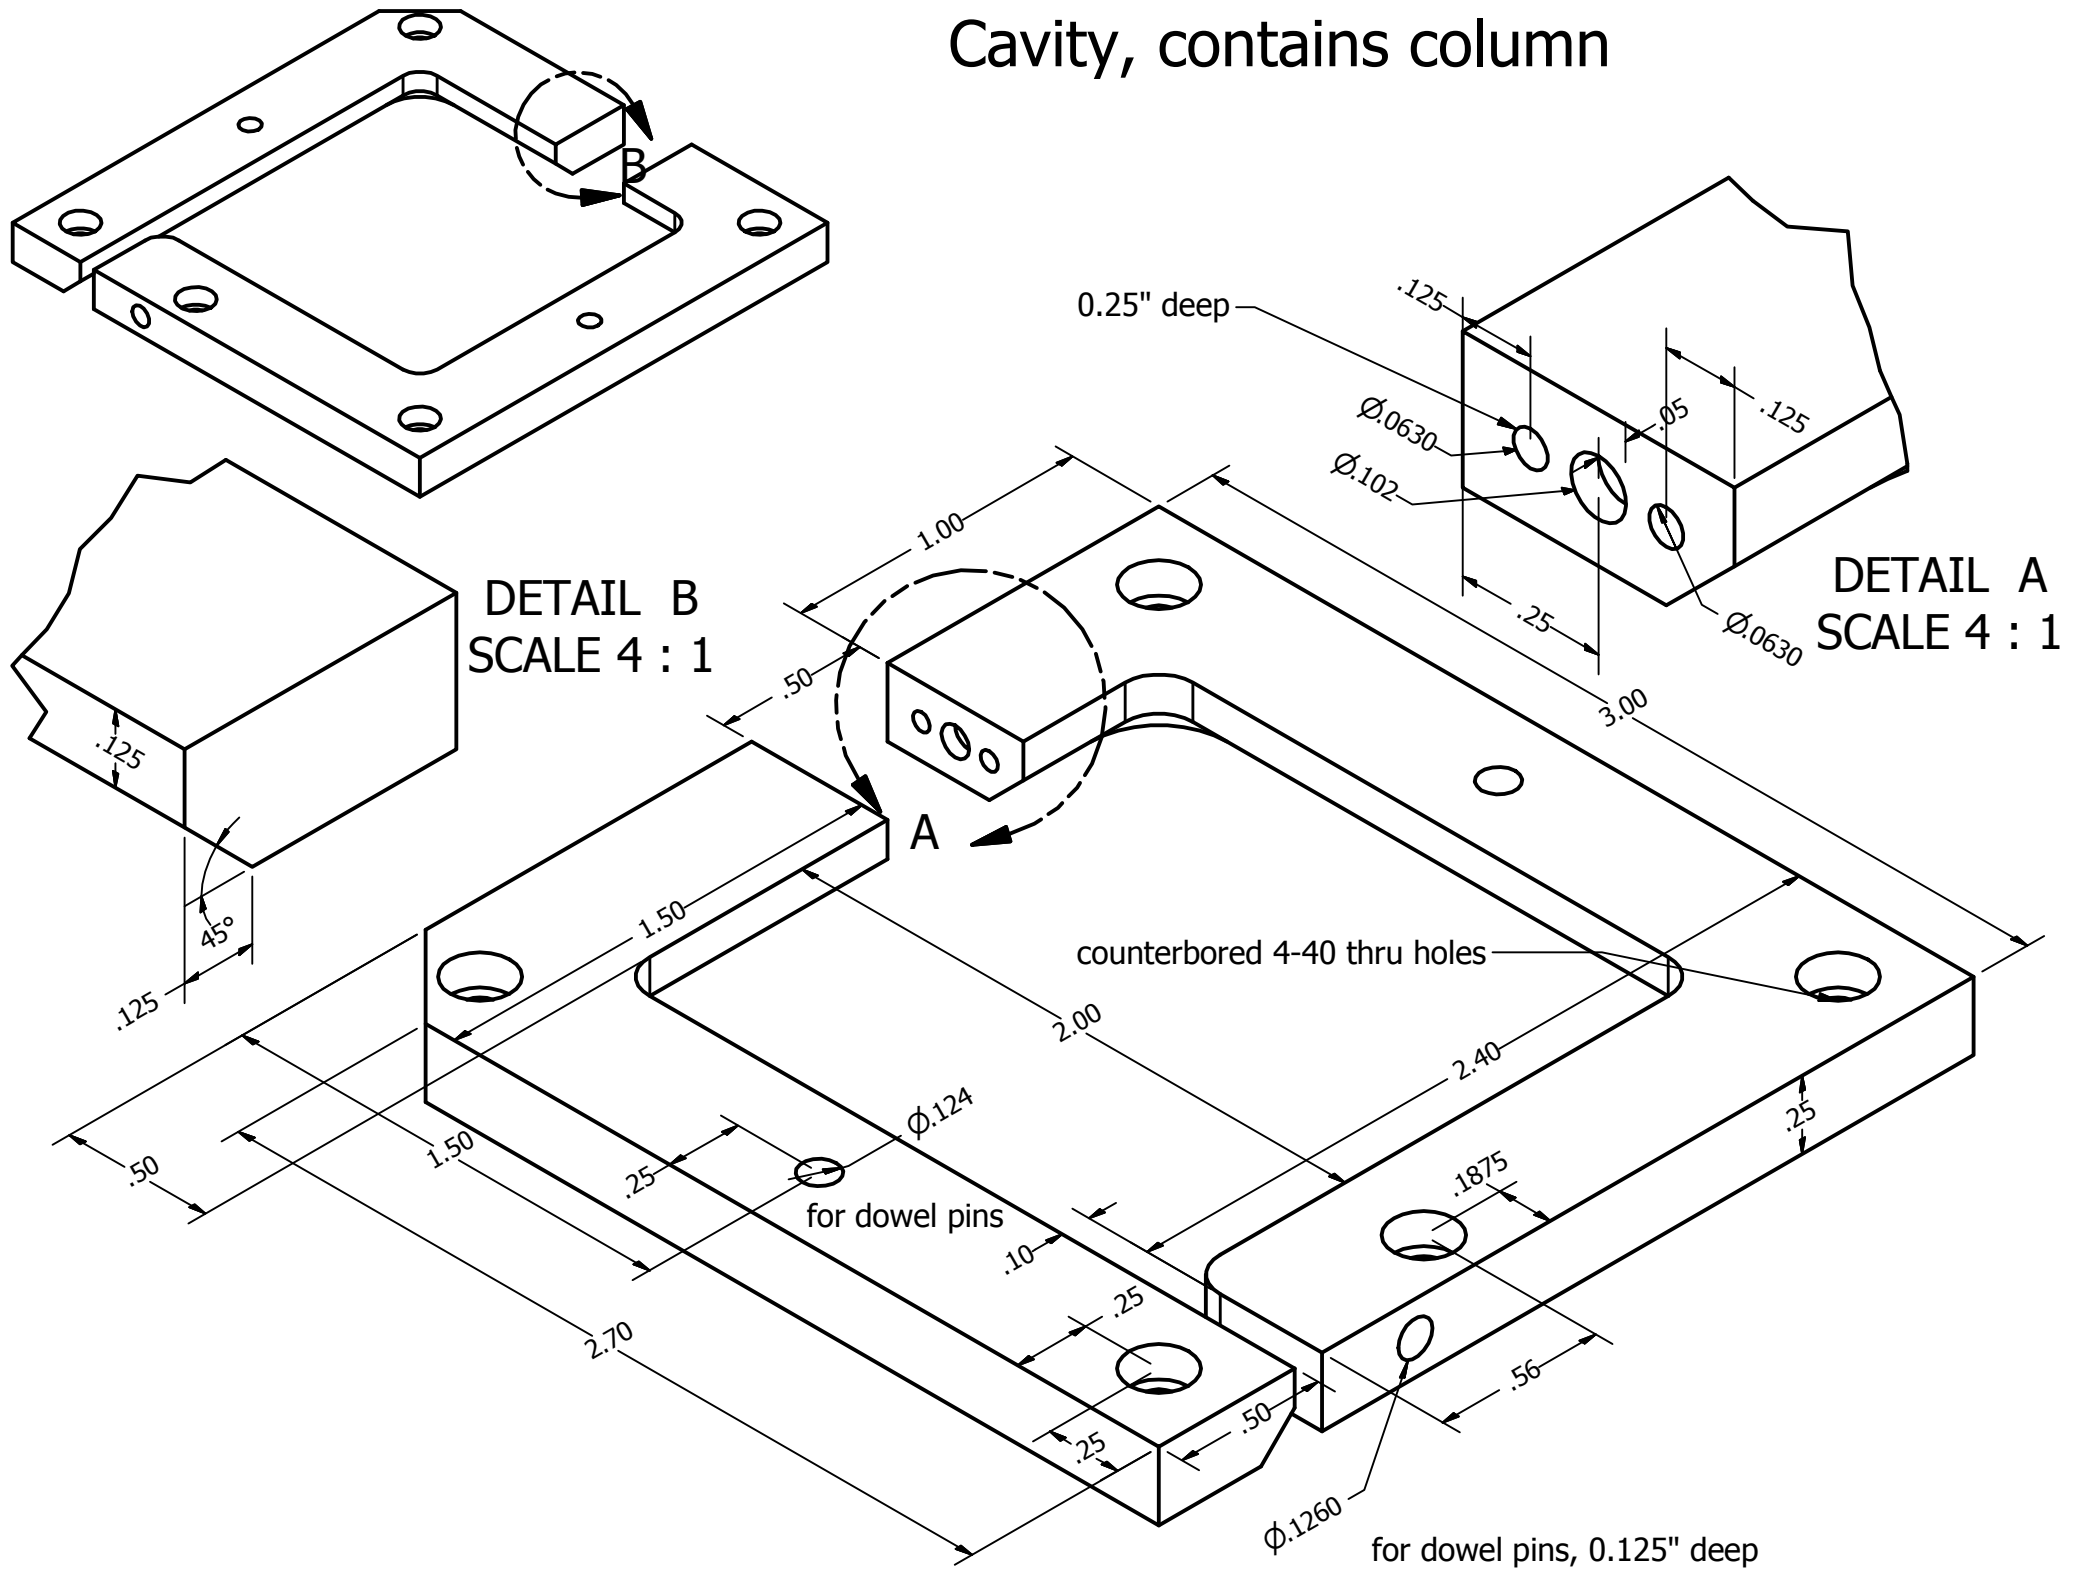

# Central Aluminum Plate with heater, RTD, grounding wire

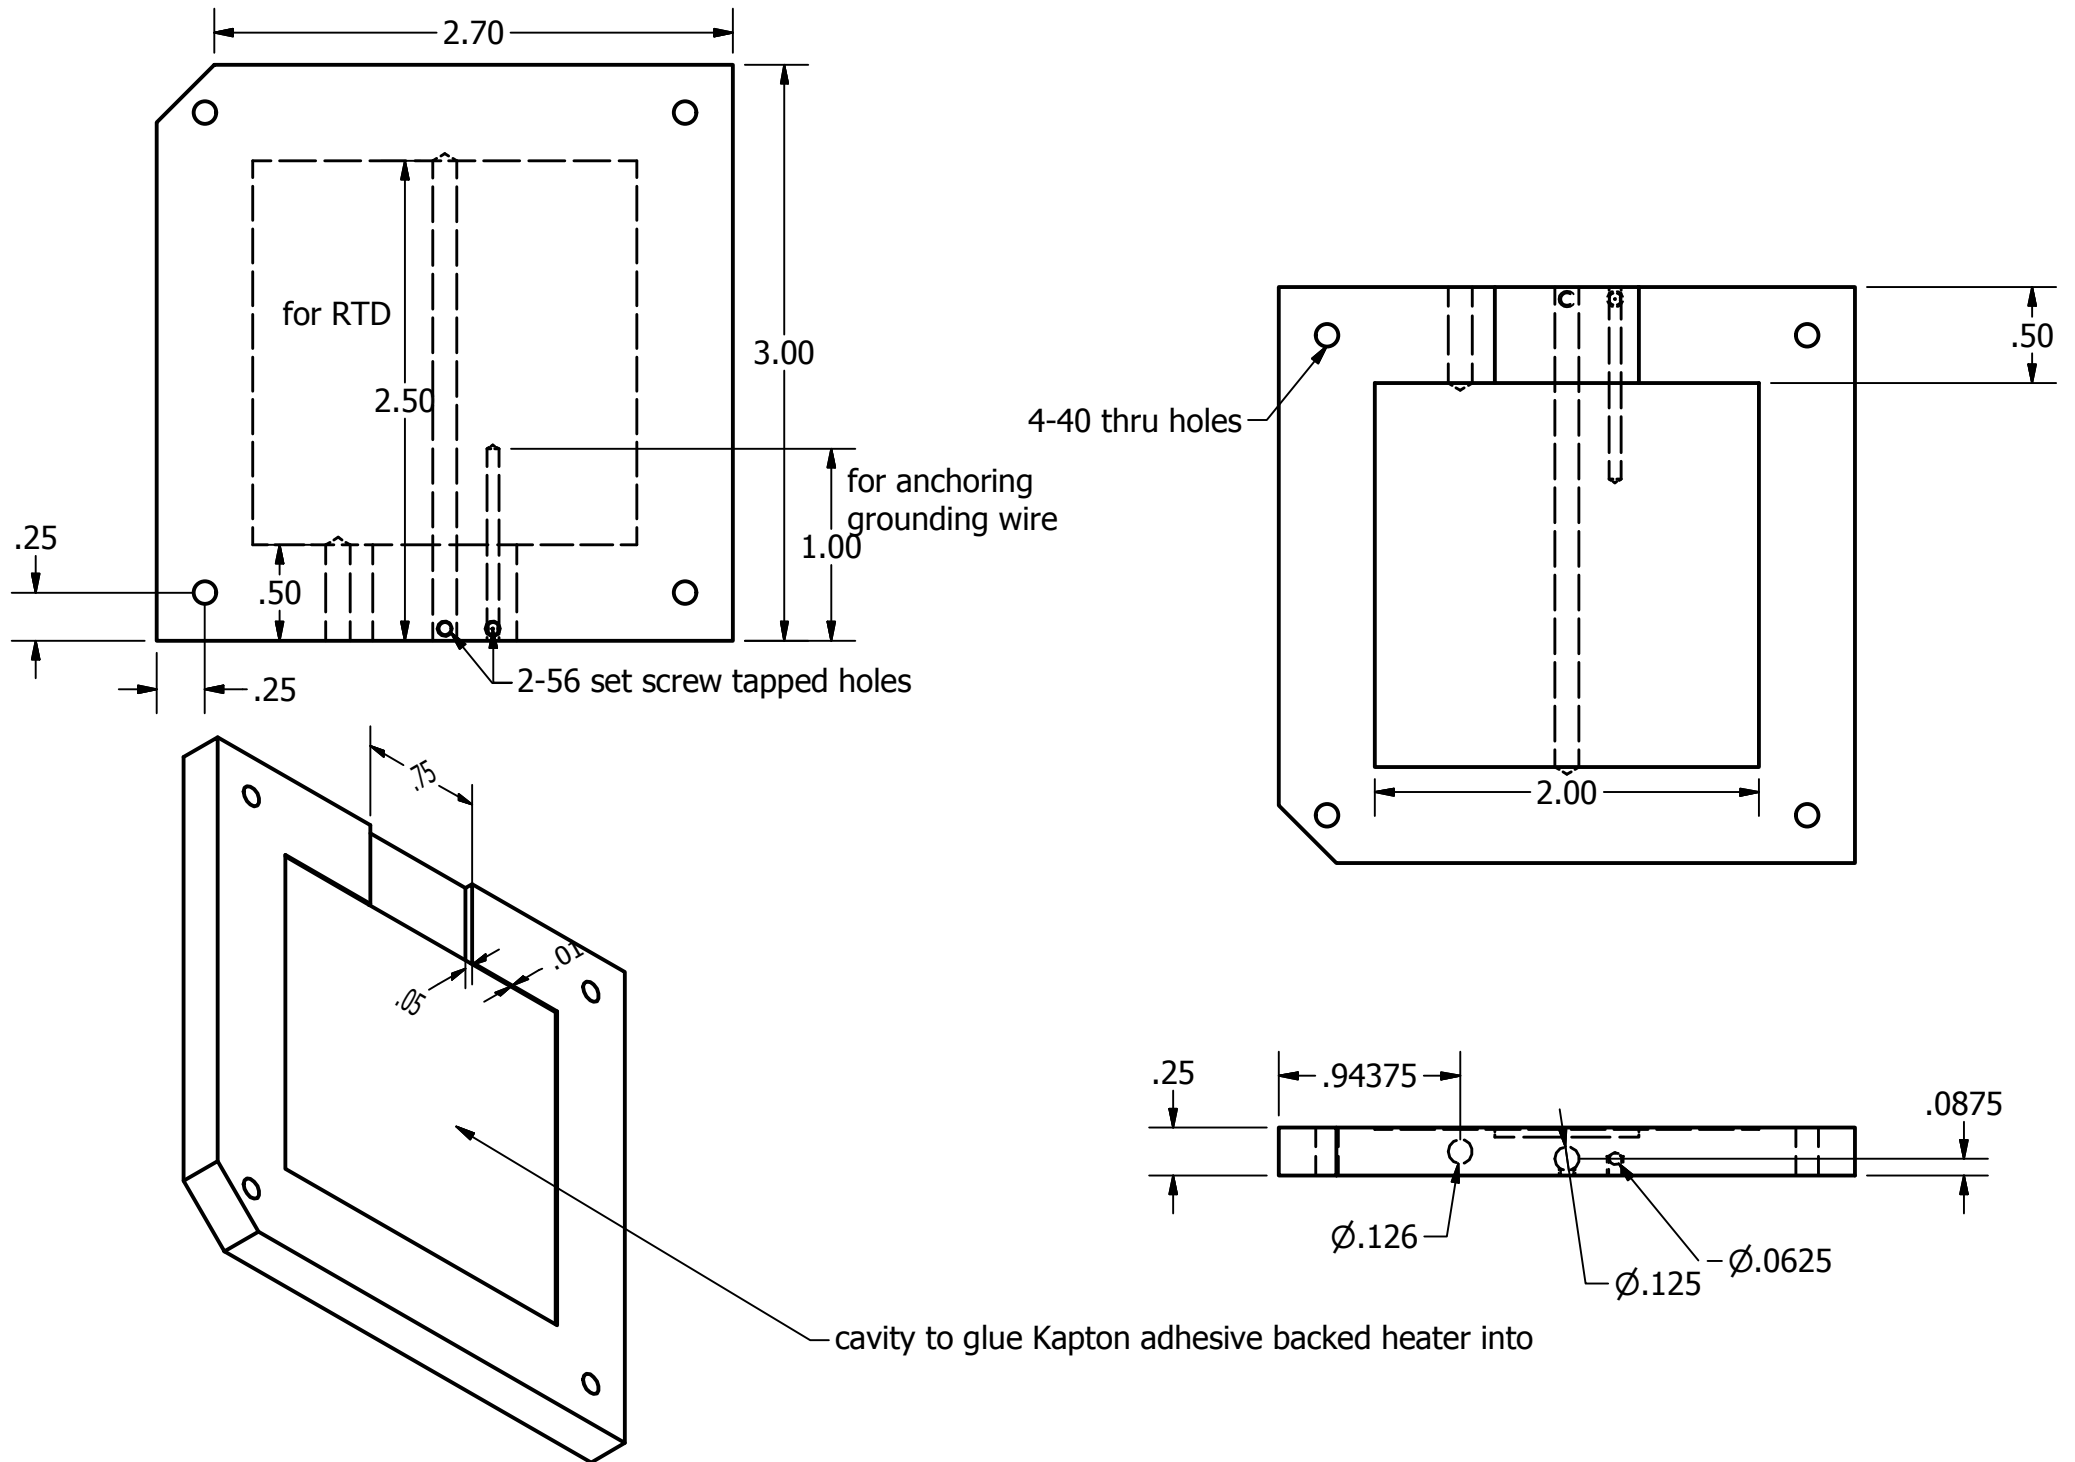

# Column Retainer (spring loaded, with dowel pins)

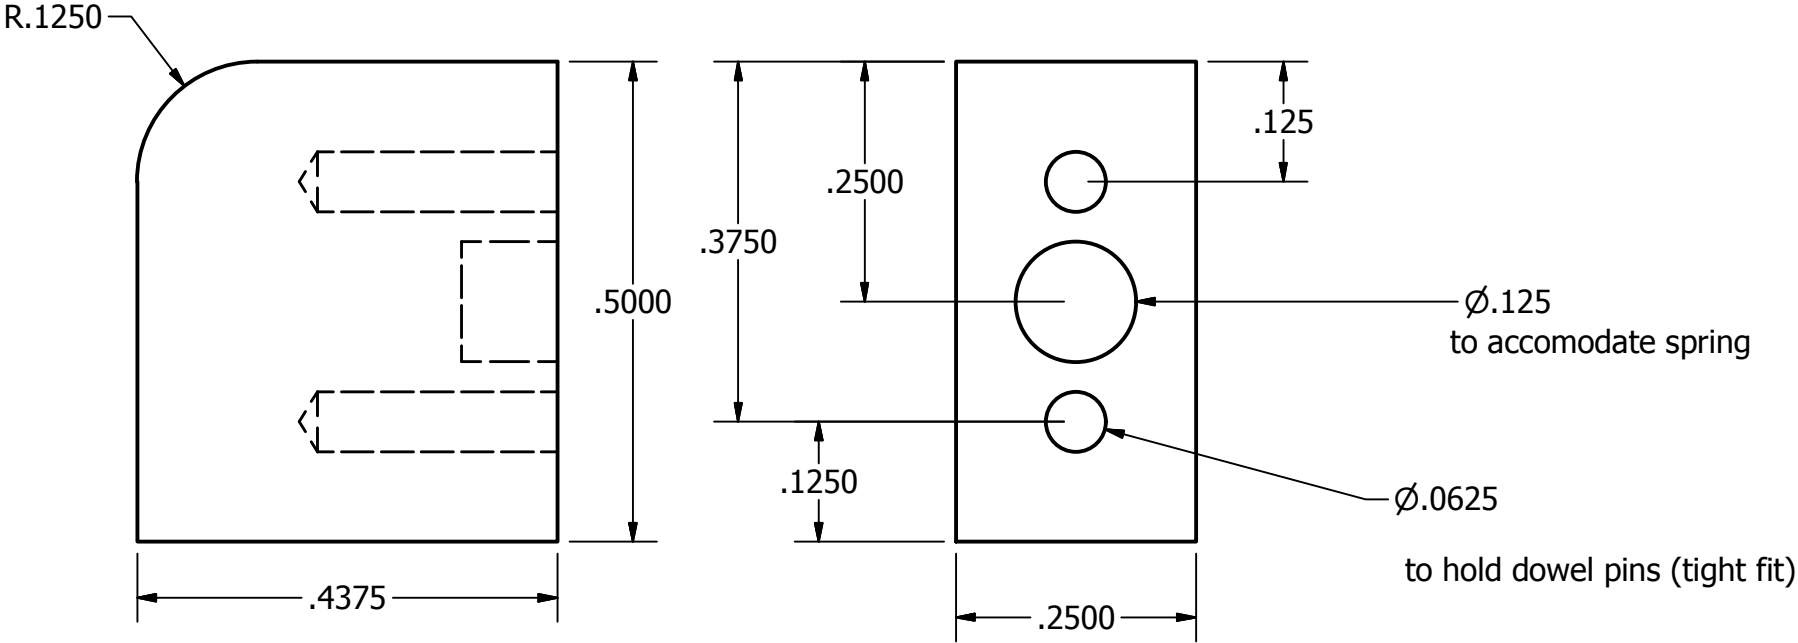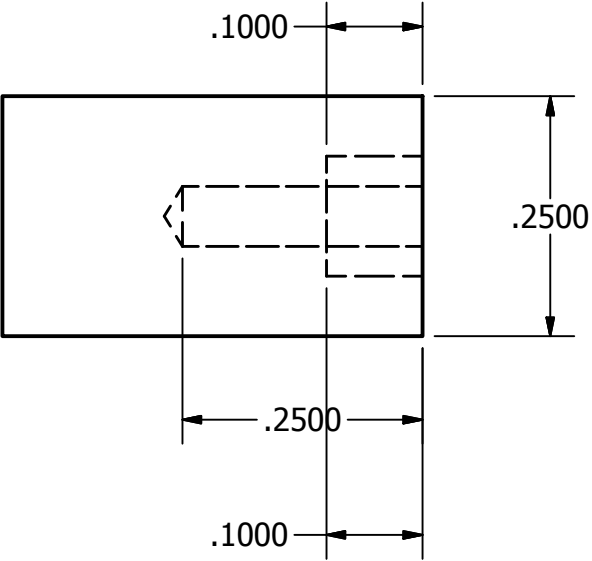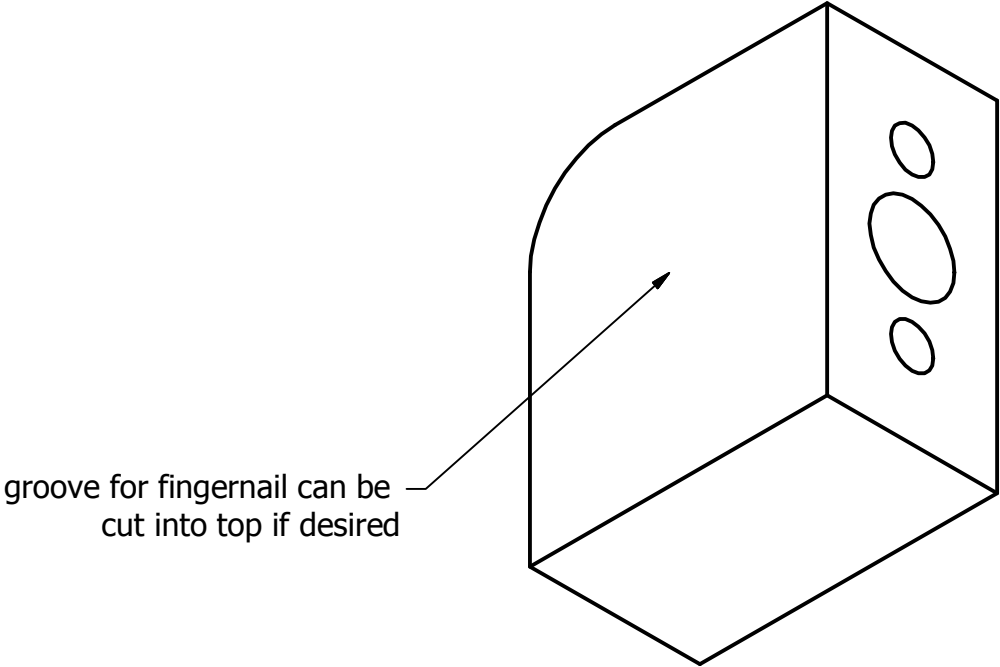

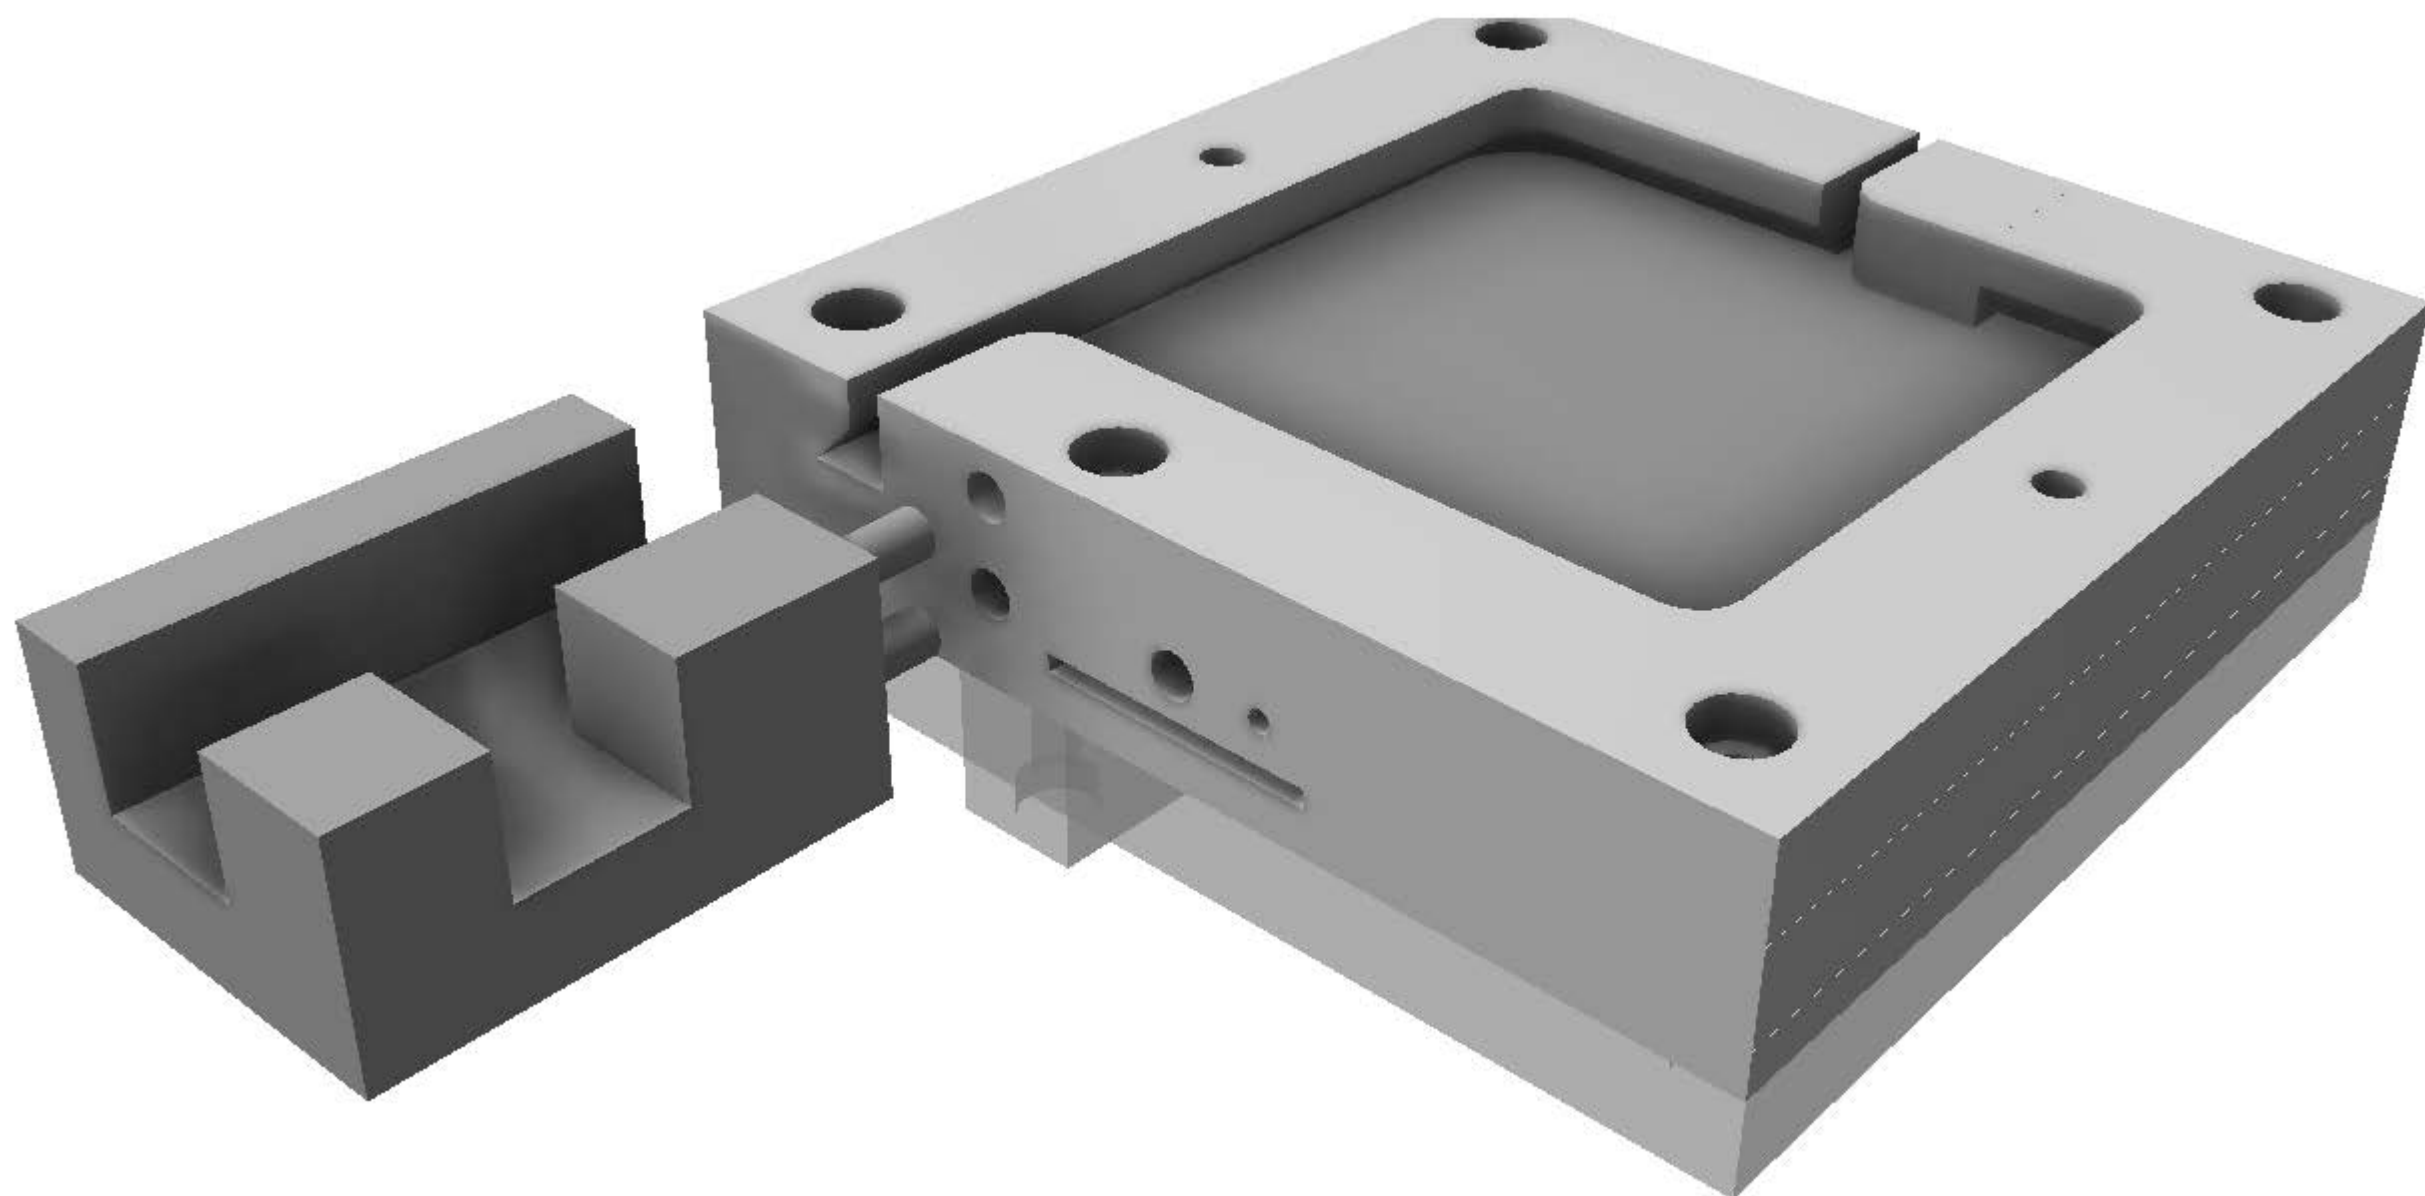

# Heater Lid

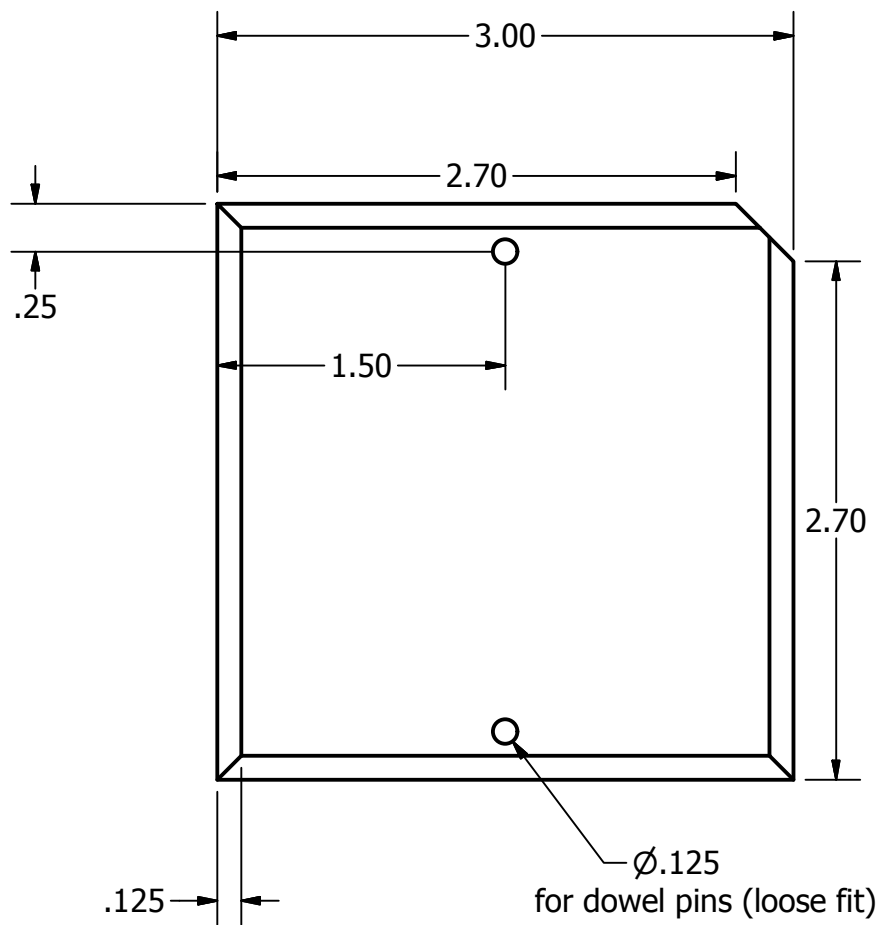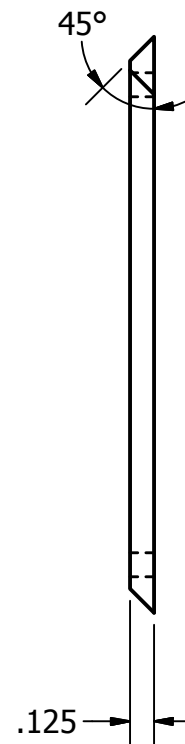

# Polycarbonate Bottom Plate

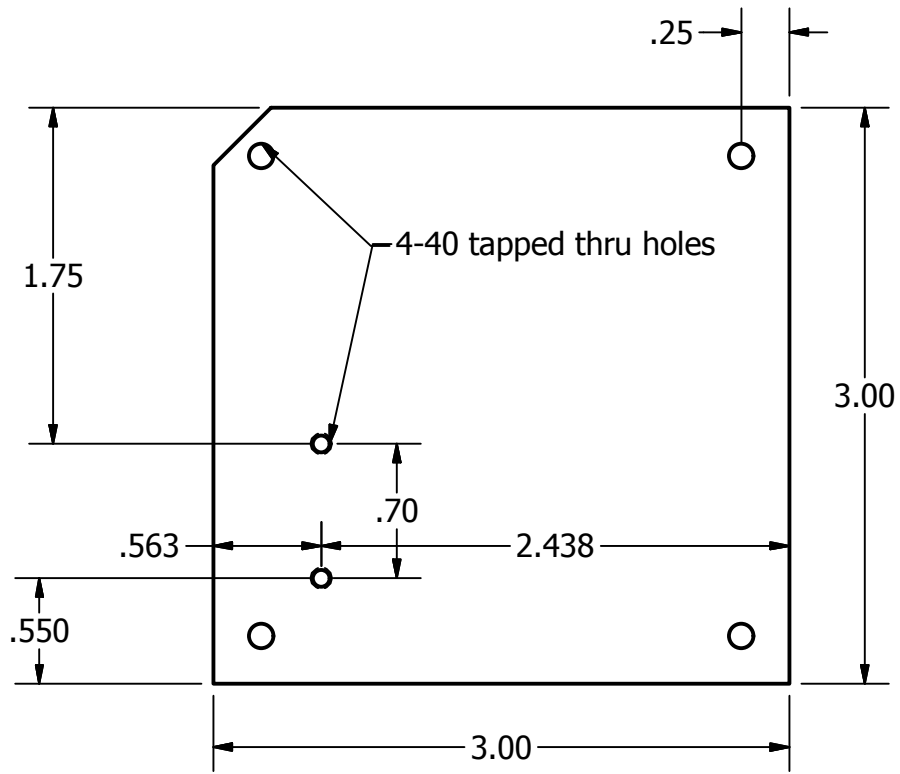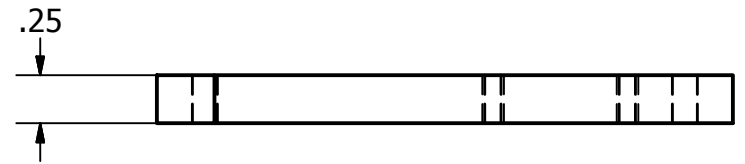

# HPLC Union Bracket (PC)

for use with UH-750 microTee or UH-436 microUnion

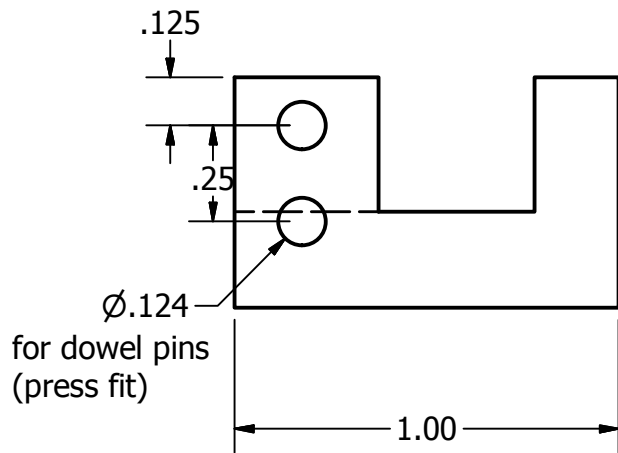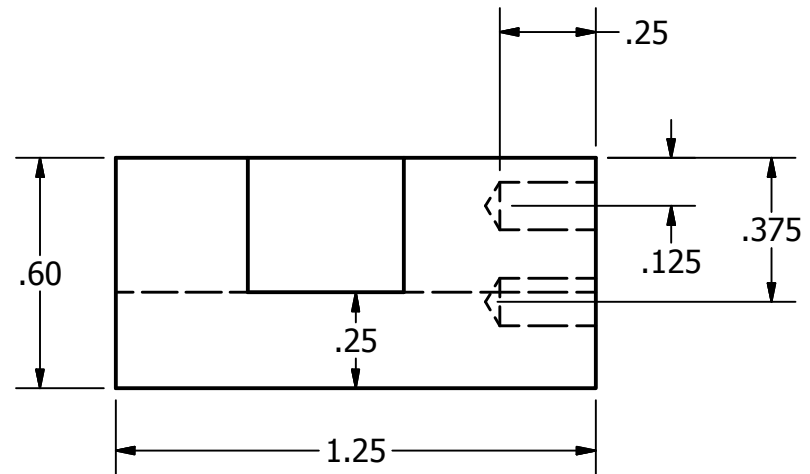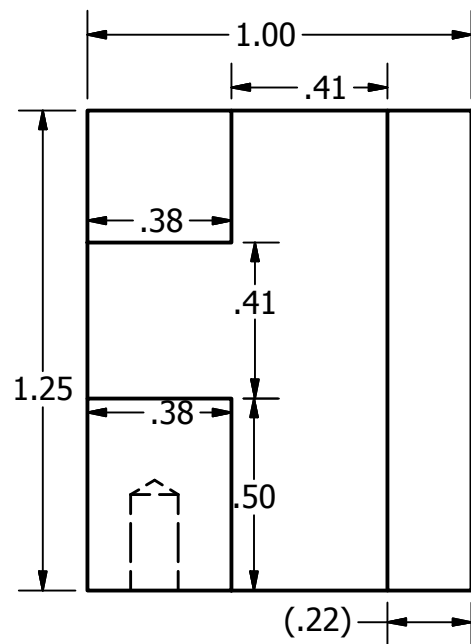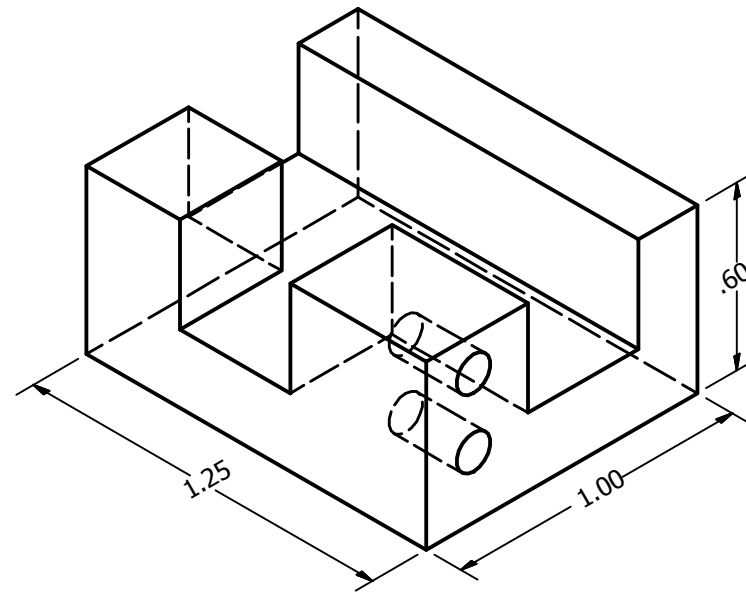

Supplement: NIHMS1011400-supplement-Supporting_Information.pdf [file NIHMS1011400-supplement-Supporting_Information.pdf]
